# Supplementary material
Source: publisher site journal article supplement (https://www.dovepress.com/article/344592)
Supplement: Supplementary file 1 [file get_supplementary_file.php]

Table S1. Search strategy

| **Search Strategy(pubmed)** |
| --- |
| ((("Renal Insufficiency, Chronic"[Mesh]) OR (((((((((((((((((((Chronic Renal Insufficiencies[Title/Abstract]) OR (Renal Insufficiencies, Chronic[Title/Abstract])) OR (Chronic Renal Insufficiency[Title/Abstract])) OR (Kidney Insufficiency, Chronic[Title/Abstract])) OR (Chronic Kidney Insufficiency[Title/Abstract])) OR (Chronic Kidney Insufficiencies[Title/Abstract])) OR (Kidney Insufficiencies, Chronic[Title/Abstract])) OR (Chronic Kidney Diseases[Title/Abstract])) OR (Chronic Kidney Disease[Title/Abstract])) OR (Disease, Chronic Kidney[Title/Abstract])) OR (Diseases, Chronic Kidney[Title/Abstract])) OR (Kidney Disease, Chronic[Title/Abstract])) OR (Kidney Diseases, Chronic[Title/Abstract])) OR (Chronic Renal Diseases[Title/Abstract])) OR (Chronic Renal Disease[Title/Abstract])) OR (Disease, Chronic Renal[Title/Abstract])) OR (Diseases, Chronic Renal[Title/Abstract])) OR (Renal Disease, Chronic[Title/Abstract])) OR (Renal Diseases, Chronic[Title/Abstract]))) AND (("Sodium Bicarbonate"[Mesh]) OR ((((((Bicarbonate, Sodium[Title/Abstract]) OR (Carbonic Acid Monosodium Salt[Title/Abstract])) OR (Sodium Hydrogen Carbonate[Title/Abstract])) OR (Hydrogen Carbonate, Sodium[Title/Abstract])) OR (Baking Soda[Title/Abstract])) OR (Soda, Baking[Title/Abstract])))) AND (randomized controlled trial[Publication Type] OR randomized[Title/Abstract] OR placebo[Title/Abstract]) Filters: from 2015 - 2020 Sort by: Most Recent |

Table S2. Publication bias of change in serum bicarbonate level

| Begg's Test | | | | | |
| --- | --- | --- | --- | --- | --- |
| adj. Kendall's Score (P-Q) = 4 | | | | | |
| Std. Dev. of Score = 11.18 (corrected for ties) | | | | | |
| Number of Studies = 10 | | | | | |
| z = 0.36 | | | | | |
| Pr > |z| = 0.721 | | | | | |
| z = 0.27 (continuity corrected) | | | | | |
| Pr > |z| = 0.788 (continuity corrected) | | | | | |
| Egger's test | | | | | |
| Std_Eff | | Coef. | Std. Err. | t | P>|t| | [95% Conf. Interval] |
| slope | 5.740737 | 0.7546093 | 7.61 | 0 | 4.000605 7.480869 |
| bias | -8.422078 | 3.017465 | -2.79 | 0.024 | -15.38036 -1.463793 |


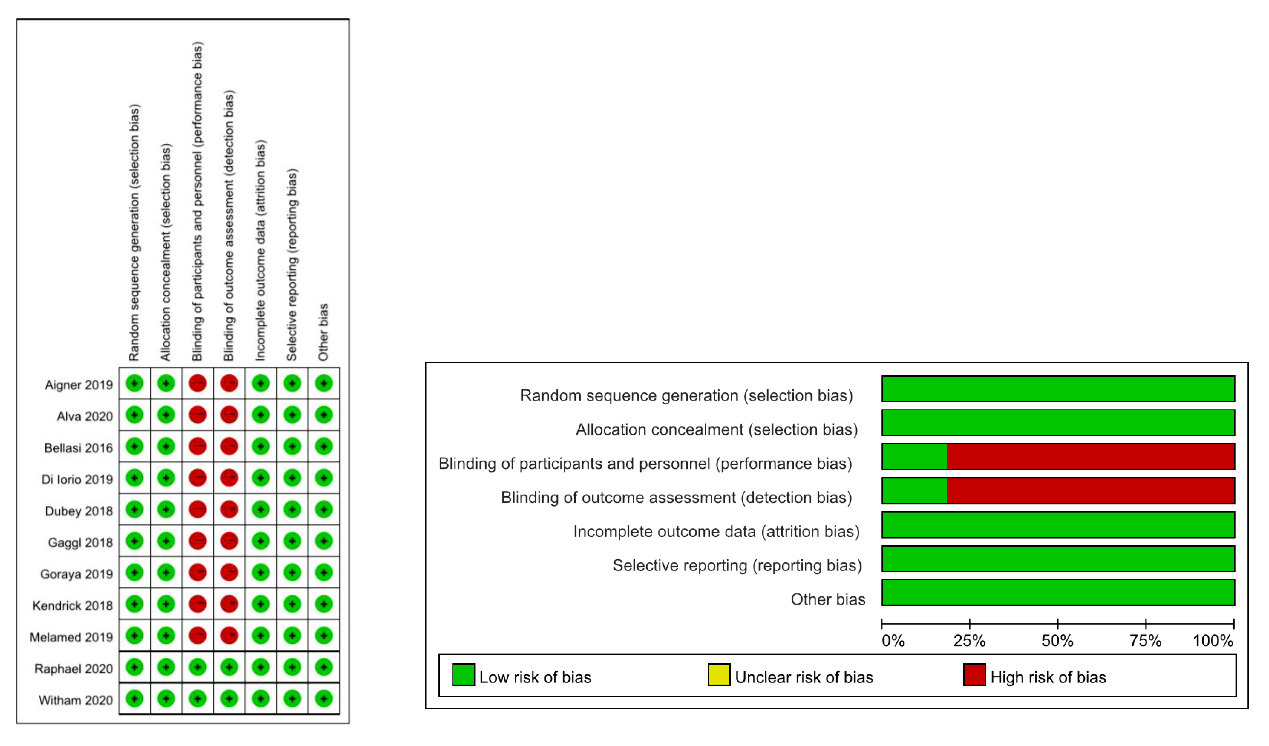


Figure S1**:** Study quality.
